# Supplementary material for: Examination of Dysglycaemia among Newly Diagnosed Tuberculosis Patients in Ghana: A Cross-Sectional Study
Source: PubMed Central journal article supplement (PMC6174760; doi:10.1155/2018/1830372), 2018-09-24

**SUPPLEMENTARY MATERIAL I**

Detailed evaluation of the effects of socio-demographic factors on 2HPP status of the study participants using six nested models.

|            |     | <b>2HPP Status</b> |                   |                   |                   |                   |                   |
|------------|-----|--------------------|-------------------|-------------------|-------------------|-------------------|-------------------|
|            |     | <b>Model 1</b>     | <b>Model 2</b>    | <b>Model 3</b>    | <b>Model 4</b>    | <b>Model 5</b>    | <b>Model 6</b>    |
| Predictors | Age | Age                | Age               | Age               | Age               | Age               | Age               |
|            |     | Educational level  | Educational level | Educational level | Educational level | Educational level | Educational level |
|            |     |                    | Employment status | Employment status | Employment status | Employment status | Employment status |
|            |     |                    |                   | Gender            | Gender            | Gender            | Gender            |
|            |     |                    |                   |                   |                   |                   | Marital status    |
|            |     |                    |                   |                   |                   |                   |                   |

**Model performance index**

|               |                                |                                |                                |                                |                                 |                                 |
|---------------|--------------------------------|--------------------------------|--------------------------------|--------------------------------|---------------------------------|---------------------------------|
| AUROC (95%CI) | 60.14%<br>(50.66 - 69.62)      | 67.19%<br>(58.36 - 76.03)      | 68.00%<br>(59.31 - 76.70)      | 68.02%<br>(59.32 - 76.73)      | 69.13%<br>(60.65 - 77.61)       | 69.88%<br>(61.50 - 78.26)       |
| AIC           | 196.40                         | 198.85                         | 198.85                         | 200.30                         | 205.06                          | 208.58                          |
| HL GOF        | $\chi^2 = 5.70$<br>$p = 0.681$ | $\chi^2 = 8.68$<br>$p = 0.370$ | $\chi^2 = 4.15$<br>$p = 0.843$ | $\chi^2 = 5.25$<br>$p = 0.731$ | $\chi^2 = 12.68$<br>$p = 0.123$ | $\chi^2 = 12.47$<br>$p = 0.132$ |

*2HPP: 2-hour postprandial glucose, AUROC: Area under receiver operating characteristic curve, AIC: Akaike Information criterion, HL GOF: Hosmer Lameshow Goodness of fit test.*

**SUPPLEMENTARY MATERIAL II**

Comparing the performance of six nested models used in assessing the effect of socio-demographic factors on 2HPP (2-hour postprandial glucose) status.

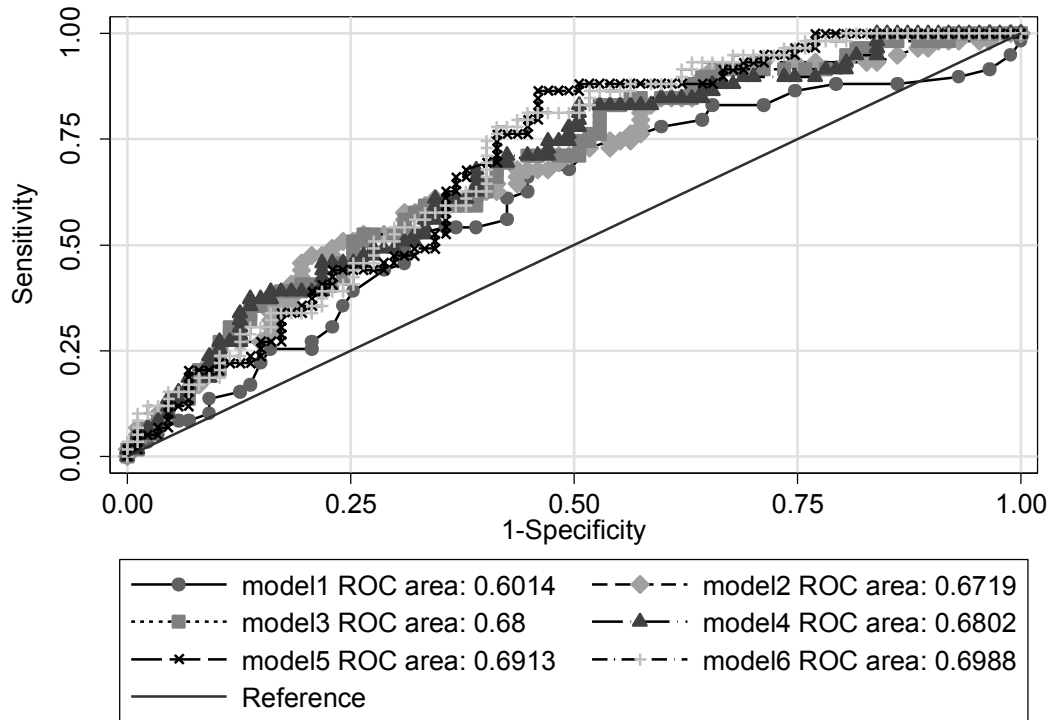

### **SUPPLEMENTARY MATERIAL III**

Comparing the performance of two nested models used in assessing the effect of clinical and lifestyle factors on 2HPP (2-hour postprandial glucose) status.

In investigating the effect of clinical and lifestyle factors, two different nested models were fitted to evaluate the effect of clinical and lifestyle factors on HPP status. Model 11 consists of only clinical and lifestyle factor and model 12 integrates both clinical, lifestyle factor and socio-demographic characteristics. The performance of these two models was evaluated with the Area under Receiver Operating Characteristic Curve (AUROC) and Akaike Information Criterion (AIC). There was statistical significance difference in AUROC between the two nested models ( $\chi^2 = 5.60, p = 0.018$ ), the best performing model was model 12 (AUROC=73.39%, AIC=216.85).

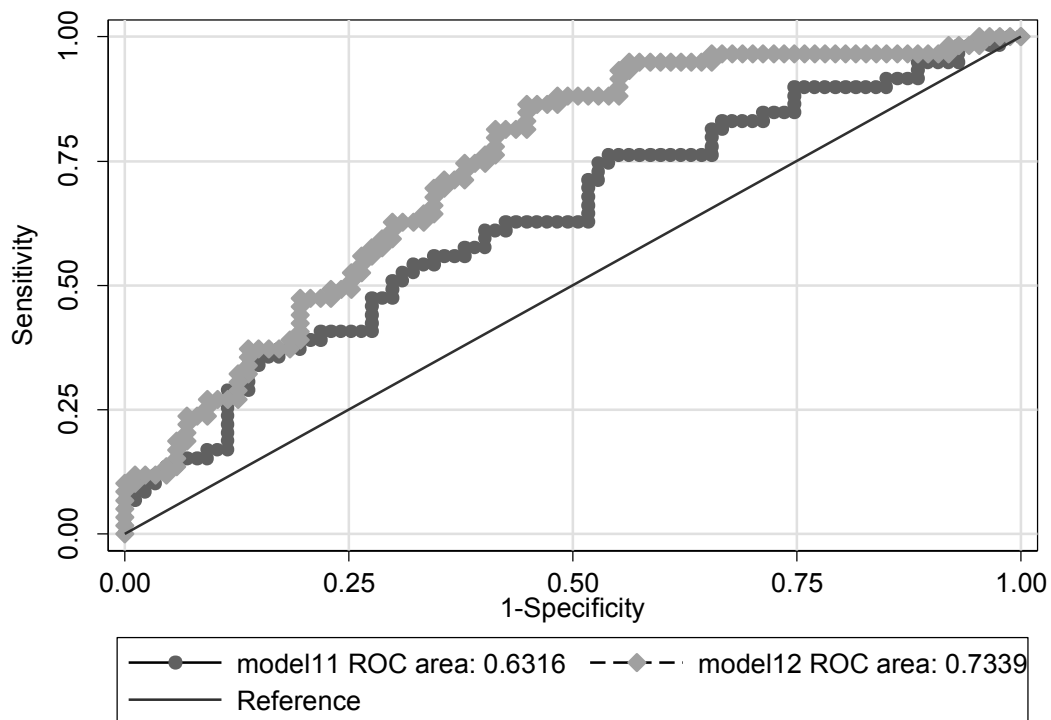

Supplement: 1830372.f1.pdf [file 1830372.f1.pdf]
